# Supplementary material for: QuEChERS-Based Methodology for the Screening of Alkylphenols and Bisphenol A in Dairy Products Using LC-LTQ/Orbitrap MS
Source: MDPI journal article supplement (doi:10.3390/app11209358), 2021-10-09
Supplement: s1 [file s1]

## **SUPPLEMENTARY MATERIAL**

**QuEChERS-based methodology for the screening of Alkylphenols and Bisphenol A in dairy products**

**V.I. Boti\*, V.S. Kobothebra, T.A. Albanis, I.K. Konstantinou**

Department of Chemistry, University of Ioannina, Panepistimioupolis, 45110 Ioannina, Greece

**Table S1.** Characteristics of the selected dairy products.

| A/A | Food Commodity                    | Fat (%) | Type of Packaging |
|-----|-----------------------------------|---------|-------------------|
| 1   | Fresh cow milk1                   | 3.5     | paper             |
| 2   | Fresh cow milk2                   | 1.5     | paper             |
| 3   | Pasteurized milk1                 | 3.5     | paper             |
| 4   | Pasteurized milk2                 | 0       | paper             |
| 5   | Chocolate milk                    | 1       | paper             |
| 6   | Condensed milk                    | 7       | aluminum          |
| 7   | Coconut milk                      | 7.6     | aluminum          |
| 8   | Cream1                            | 35      | paper             |
| 9   | Cream2                            | 17      | paper             |
| 10  | Organic yoghurt                   | 3.9     | plastic           |
| 11  | Goat yoghurt                      | 4       | plastic           |
| 12  | Cow yoghurt1                      | 3.9     | plastic           |
| 13  | Cow yoghurt2                      | 2       | plastic           |
| 14  | Cow yoghurt3                      | 0       | plastic           |
| 15  | Strained yoghurt1                 | 8       | plastic           |
| 16  | Strained yoghurt2                 | 0       | plastic           |
| 17  | Yoghurt dessert                   | 1       | plastic           |
| 18  | Sheep yoghurt                     | 6       | plastic           |
| 19  | Goat-sheep yoghurt                | 4       | plastic           |
| 20  | Infant yoghurt                    | 4.4-4.6 | plastic           |
| 21  | Powdered milk                     | 0.8     | paper             |
| 22  | Hydrolyzed protein infant formula | 3.5     | aluminum          |
| 23  | Organic infant formula            | 2.7     | paper             |
| 24  | Lactose free infant formula       | 3.6     | aluminum          |
| 25  | Condensed infant milk             | 3.1     | aluminum          |
| 26  | Ice cream1                        | 3.5     | plastic           |
| 27  | Ice cream2                        | 0       | plastic           |

**Table S2.** Data from LC-Orbitrap/MS<sup>2</sup> analysis of the target EDCs.

| Chemical Compounds | Orbitrap MS                                                 |                  |                   |            | Orbitrap MS <sup>2</sup> |
|--------------------|-------------------------------------------------------------|------------------|-------------------|------------|--------------------------|
|                    | Precursor Ion                                               | Theoretical Mass | Experimental Mass | Mass Error | Fragment Ion             |
|                    |                                                             | ( <i>m/z</i> )   | ( <i>m/z</i> )    | (ppm)      | (NCE 45%)*               |
| BPA                | C <sub>15</sub> H <sub>15</sub> O <sub>2</sub> <sup>+</sup> | 227.1078         | 227.1084          | 2.64       | 212.0845                 |
| OP                 | C <sub>14</sub> H <sub>21</sub> O <sup>+</sup>              | 205.1598         | 205.1595          | -1.46      | 133.0062                 |
| NP(t)              | C <sub>15</sub> H <sub>23</sub> O <sup>+</sup>              | 219.1754         | 219.1750          | -1.83      | 106.0431                 |
| 4NP                | C <sub>15</sub> H <sub>23</sub> O <sup>+</sup>              | 219.1754         | 219.1750          | -1.83      | 106.0431                 |

**Table S3.** LC-Orbitrap MS parameters under investigation using a fractional factorial design  $3^{(4-1)}$  and their coded values.

| Factors                                 | Coded Levels |      |      |
|-----------------------------------------|--------------|------|------|
|                                         | (-1)         | (0)  | (+1) |
| Injection volume ( $\mu\text{L}$ )      | 5            | 10   | 20   |
| Spray voltage (V)                       | 2.5          | 3.0  | 3.5  |
| NH <sub>3</sub> (%)                     | 0            | 0.05 | 0.1  |
| Oven temperature ( $^{\circ}\text{C}$ ) | 20           | 30   | 40   |

**Table S4.** Plackett–Burman design with the selected factors and their coded values.

| Factors                                     | Coded Levels |      |      |
|---------------------------------------------|--------------|------|------|
|                                             | (-1)         | (0)  | (+1) |
| (x <sub>1</sub> ) Sample amount (mL)        | 5            | 7.5  | 10   |
| (x <sub>2</sub> ) Solvent volume (ACN) (mL) | 5            | 10   | 15   |
| (x <sub>3</sub> ) MgSO <sub>4</sub> (g)     | 4            | 5    | 6    |
| (x <sub>4</sub> ) NaCl (g)                  | 0.5          | 1    | 2    |
| (x <sub>5</sub> ) PSA (mg)                  | 25           | 37.5 | 50   |
| (x <sub>6</sub> ) C18 (mg)                  | 25           | 37.5 | 50   |
| (x <sub>7</sub> ) CH <sub>3</sub> COOH (%)  | 0            | 1    | 2    |

  

| Experiments | X <sub>1</sub> | X <sub>2</sub> | X <sub>3</sub> | X <sub>4</sub> | X <sub>5</sub> | X <sub>6</sub> | X <sub>7</sub> |
|-------------|----------------|----------------|----------------|----------------|----------------|----------------|----------------|
| 7           | -1             | +1             | +1             | -1             | -1             | +1             | -1             |
| 3           | -1             | +1             | -1             | -1             | +1             | -1             | +1             |
| 11          | 0              | 0              | 0              | 0              | 0              | 0              | 0              |
| 9           | 0              | 0              | 0              | 0              | 0              | 0              | 0              |
| 1           | -1             | -1             | -1             | +1             | +1             | +1             | -1             |
| 8           | +1             | +1             | 1              | +1             | +1             | +1             | +1             |
| 4           | +1             | +1             | -1             | +1             | -1             | -1             | -1             |
| 10          | 0              | 0              | 0              | 0              | 0              | 0              | 0              |
| 5           | -1             | -1             | +1             | +1             | -1             | -1             | +1             |
| 6           | +1             | -1             | +1             | -1             | +1             | -1             | -1             |
| 2           | +1             | -1             | -1             | -1             | -1             | +1             | +1             |

**Table S5.** ANOVA table generated from the Plackett–Burman design.

| Factors        | Sum of Squares (SS) | Degrees of Freedom (df) | Mean Squares (MS) | F-Test   | p-Value |
|----------------|---------------------|-------------------------|-------------------|----------|---------|
| x <sub>1</sub> | 1868.13             | 1                       | 1868.133          | 800.628  | 0.00124 |
| x <sub>2</sub> | 7828.13             | 1                       | 7828.133          | 3354.914 | 0.00029 |
| x <sub>3</sub> | 8.51                | 1                       | 8.508             | 3.646    | 0.19639 |
| x <sub>4</sub> | 565.32              | 1                       | 565.320           | 242.280  | 0.00410 |
| x <sub>5</sub> | 56.45               | 1                       | 56.445            | 24.191   | 0.03893 |
| x <sub>6</sub> | 59.13               | 1                       | 59.133            | 25.343   | 0.03726 |
| x <sub>7</sub> | 1976.63             | 1                       | 1976.633          | 847.128  | 0.00117 |
| Lack of fit    | 18.17               | 1                       | 18.165            | 7.785    | 0.10803 |
| Pure error     | 4.67                | 2                       | 2.333             |          |         |
| Total SS       | 12385.14            | 10                      |                   |          |         |

**Table S6.** The Central Composite Design (CCD) including the selected factors after screening design and the mean recovery (%) used as optimal response.

| Factors                            | Coded Levels |           |           | Axial Points<br>( $\alpha=1.682$ ) |           |
|------------------------------------|--------------|-----------|-----------|------------------------------------|-----------|
|                                    | (-1)         | (0)       | (+1)      | $-\alpha$                          | $+\alpha$ |
| ( $x_1$ ) NaCl (g)                 | 1            | 1.5       | 2         | 0.66                               | 2.34      |
| ( $x_2$ ) C18 (mg)                 | 25           | 37.5      | 50        | 16.48                              | 58.52     |
| ( $x_3$ ) CH <sub>3</sub> COOH (%) | 1            | 1.5       | 2         | 0.66                               | 2.34      |
| Runs                               | $X_1$        | $X_2$     | $X_3$     | Mean Recovery (R%)                 |           |
| 1                                  | 1            | -1        | -1        | 89.5                               |           |
| 2                                  | 1            | 1         | -1        | 94.8                               |           |
| 3                                  | 1            | -1        | 1         | 87.8                               |           |
| 4                                  | -1           | -1        | 1         | 81.8                               |           |
| 5                                  | $+\alpha$    | 0         | 0         | 68.5                               |           |
| 6                                  | 0            | $+\alpha$ | 0         | 100.3                              |           |
| 7                                  | 0            | 0         | 0         | 102                                |           |
| 8                                  | 0            | 0         | $+\alpha$ | 78.5                               |           |
| 9                                  | -1           | 1         | -1        | 111.0                              |           |
| 10                                 | 0            | 0         | 0         | 108.3                              |           |
| 11                                 | 0            | 0         | 0         | 106.0                              |           |
| 12                                 | 0            | $-\alpha$ | 0         | 69.0                               |           |
| 13                                 | $-\alpha$    | 0         | 0         | 95.3                               |           |
| 14                                 | -1           | -1        | -1        | 87.5                               |           |
| 15                                 | 1            | 1         | 1         | 77.8                               |           |
| 16                                 | 0            | 0         | $-\alpha$ | 89.0                               |           |
| 17                                 | -1           | 1         | 1         | 103.3                              |           |

**Table S7.** ANOVA table generated from the Central Composite Design (CCD).

| <i>Factors</i>                            | <i>Sum of Squares (SS)</i> | <i>Degrees of freedom (df)</i> | <i>Mean Squares (MS)</i> | <i>F-Test</i> | <i>p-Value</i> |
|-------------------------------------------|----------------------------|--------------------------------|--------------------------|---------------|----------------|
| (x <sub>1</sub> )NaCl(L)                  | 453.960                    | 1                              | 453.9600                 | 45.30163      | 0.021369       |
| NaCl(Q)                                   | 433.034                    | 1                              | 433.0337                 | 43.21334      | 0.022368       |
| (x <sub>2</sub> )C18(L)                   | 630.669                    | 1                              | 630.6693                 | 62.93581      | 0.015520       |
| C18(Q)                                    | 307.826                    | 1                              | 307.8260                 | 30.71860      | 0.031046       |
| (x <sub>3</sub> )CH <sub>3</sub> COOH (L) | 182.391                    | 1                              | 182.3913                 | 18.20121      | 0.050792       |
| CH <sub>3</sub> COOH(Q)                   | 345.353                    | 1                              | 345.3529                 | 34.46349      | 0.027811       |
| x <sub>1</sub> x <sub>2</sub> (L)         | 309.383                    | 1                              | 309.3828                 | 30.87396      | 0.030897       |
| x <sub>1</sub> x <sub>3</sub> (L)         | 3.445                      | 1                              | 3.4453                   | 0.34381       | 0.616998       |
| x <sub>2</sub> x <sub>3</sub> (L)         | 37.195                     | 1                              | 37.1953                  | 3.71180       | 0.193869       |
| Lack of fit                               | 423.187                    | 5                              | 84.6374                  | 8.44615       | 0.109239       |
| Pure error                                | 20.042                     | 2                              | 10.0208                  |               |                |

**Table S8.** Mean recoveries obtained from the optimized QuEChERS extraction of the target EDCs from yogurt samples at 10 and 50 ng g<sup>-1</sup> fortification levels.

| EDCs | Rec ± RSD (%)<br>10 ng g <sup>-1</sup> | Rec ± RSD (%)<br>50 ng g <sup>-1</sup> |
|------|----------------------------------------|----------------------------------------|
| BPA  | 91±6.3                                 | 73.8±2.6                               |
| OP   | 102.1±9.1                              | 98.5±8.2                               |
| NP   | 85.1±10.2                              | 105.4±7.3                              |
| 4NP  | 93.1±7.6                               | 87.7±8.5                               |

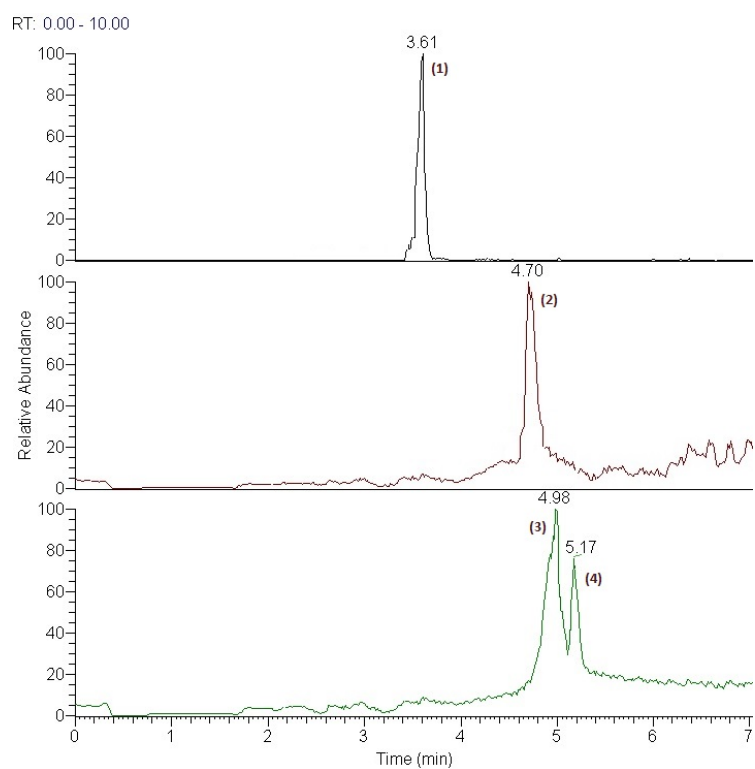

**Figure S1.** LC-LTQ/Orbitrap MS extracted ion (EI) chromatogram of a standard solution of the selected compounds at a concentration level of  $100\ \mu\text{g L}^{-1}$ . Peaks are assigned as follows: (1) BPA, (2) OP, (3) NP (t), (4) 4NP.

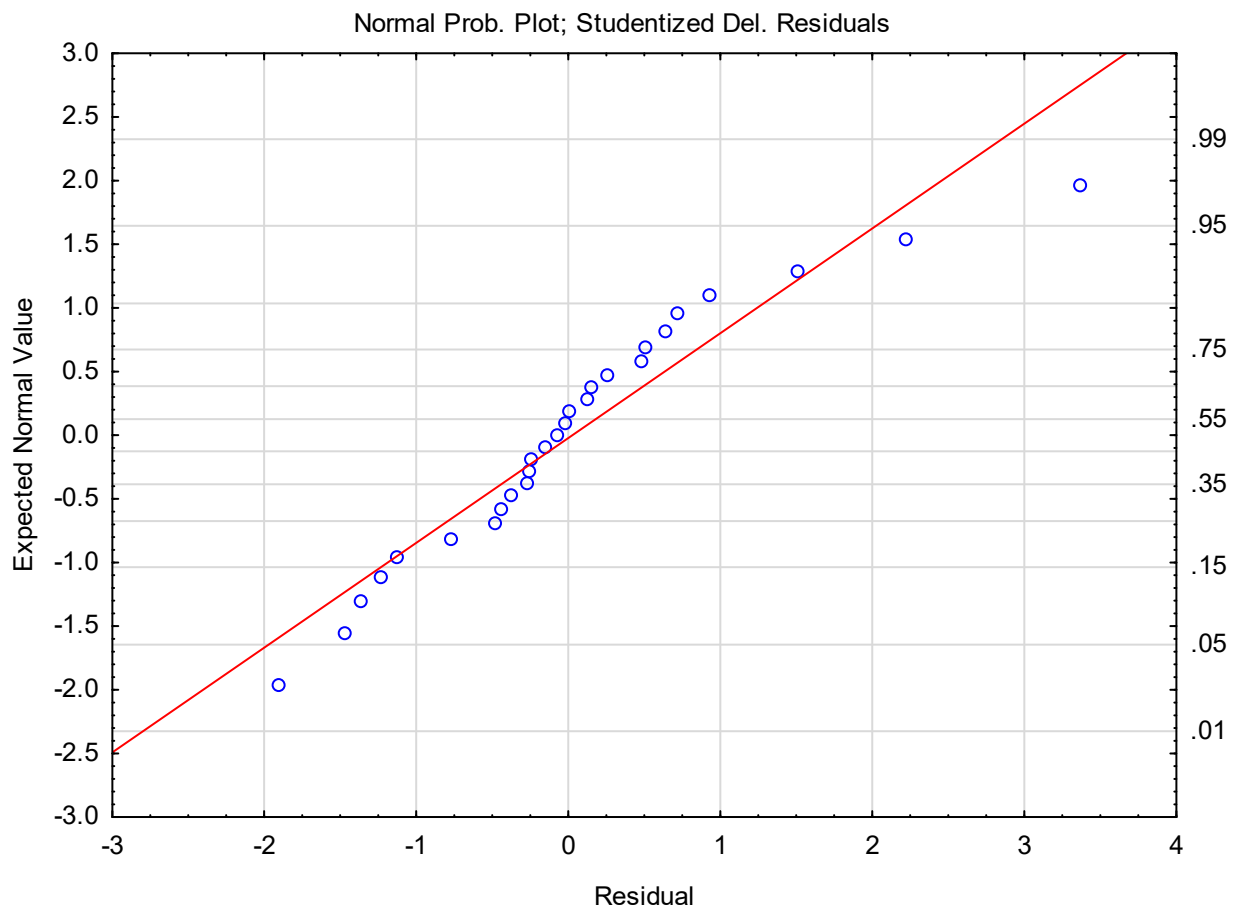

**Figure S2.** Normal probability plot of the studentized residuals (normality test curve for the fractional factorial design  $3^{(4-1)}$ ).

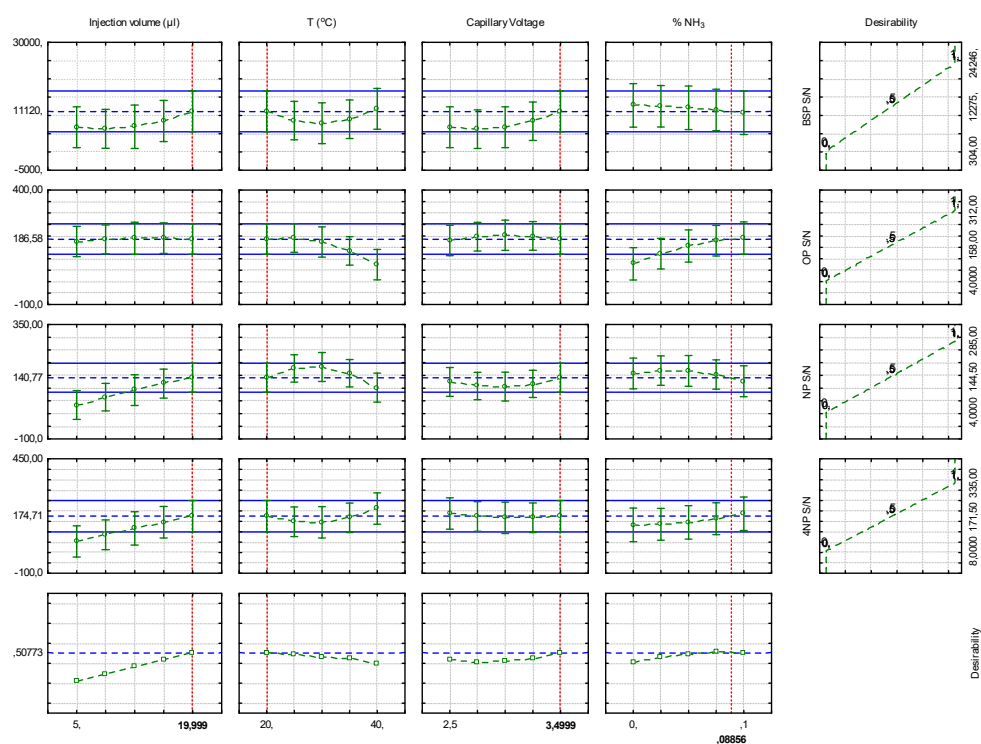

**Figure S3.** Profile of the predicted values and desirability function of analytes response (S/N). Optimum values are designated by dotted lines.



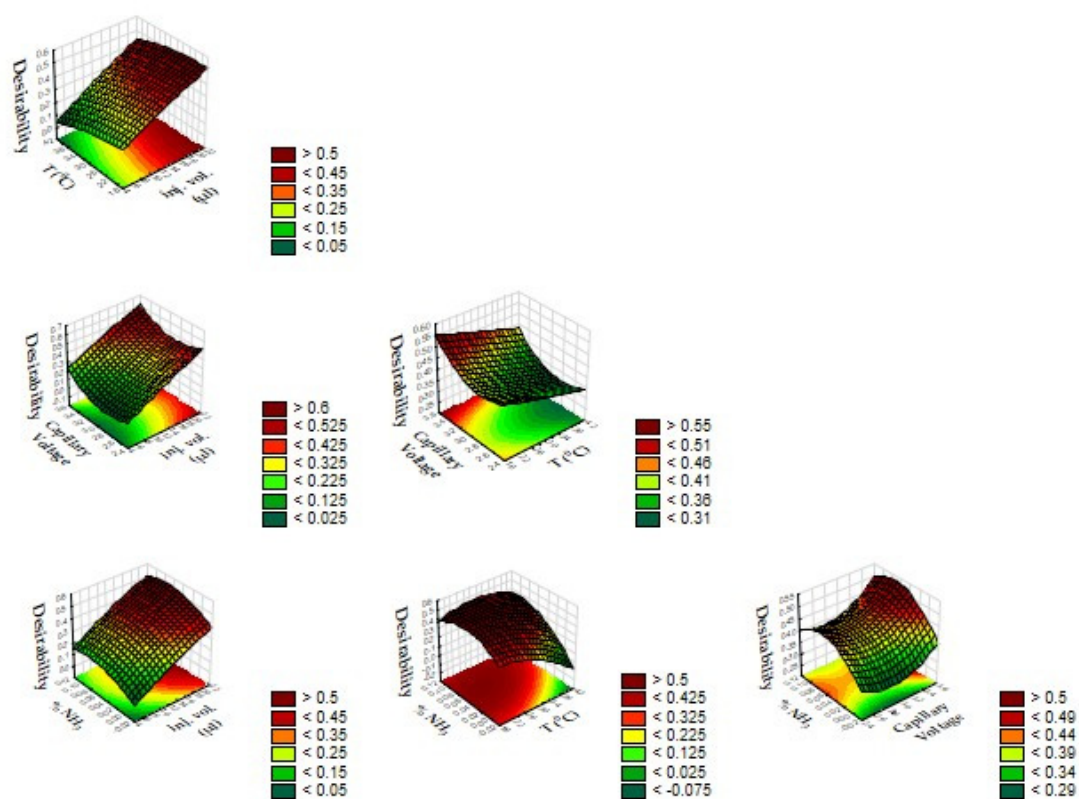

Figure S4. Response surface plots for the fractional factorial design  $3^{(4-1)}$ .

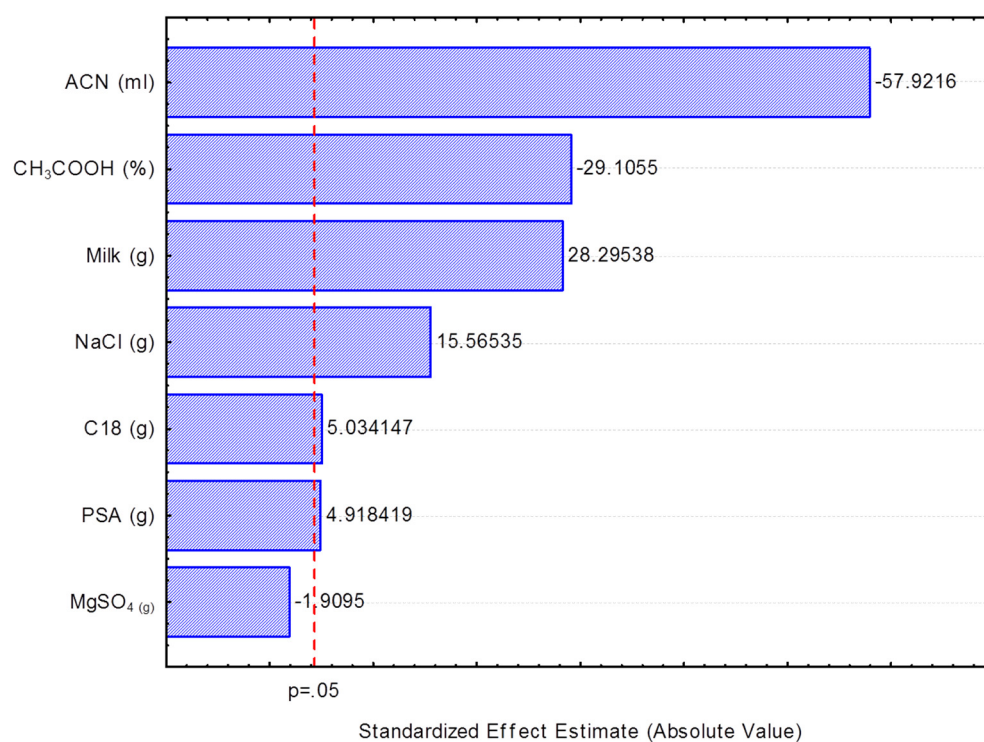

**Figure S5.** Standardized main effect Pareto chart for the Plackett–Burman design of the screening experiment. Vertical line in the chart defines 95% confidence level.

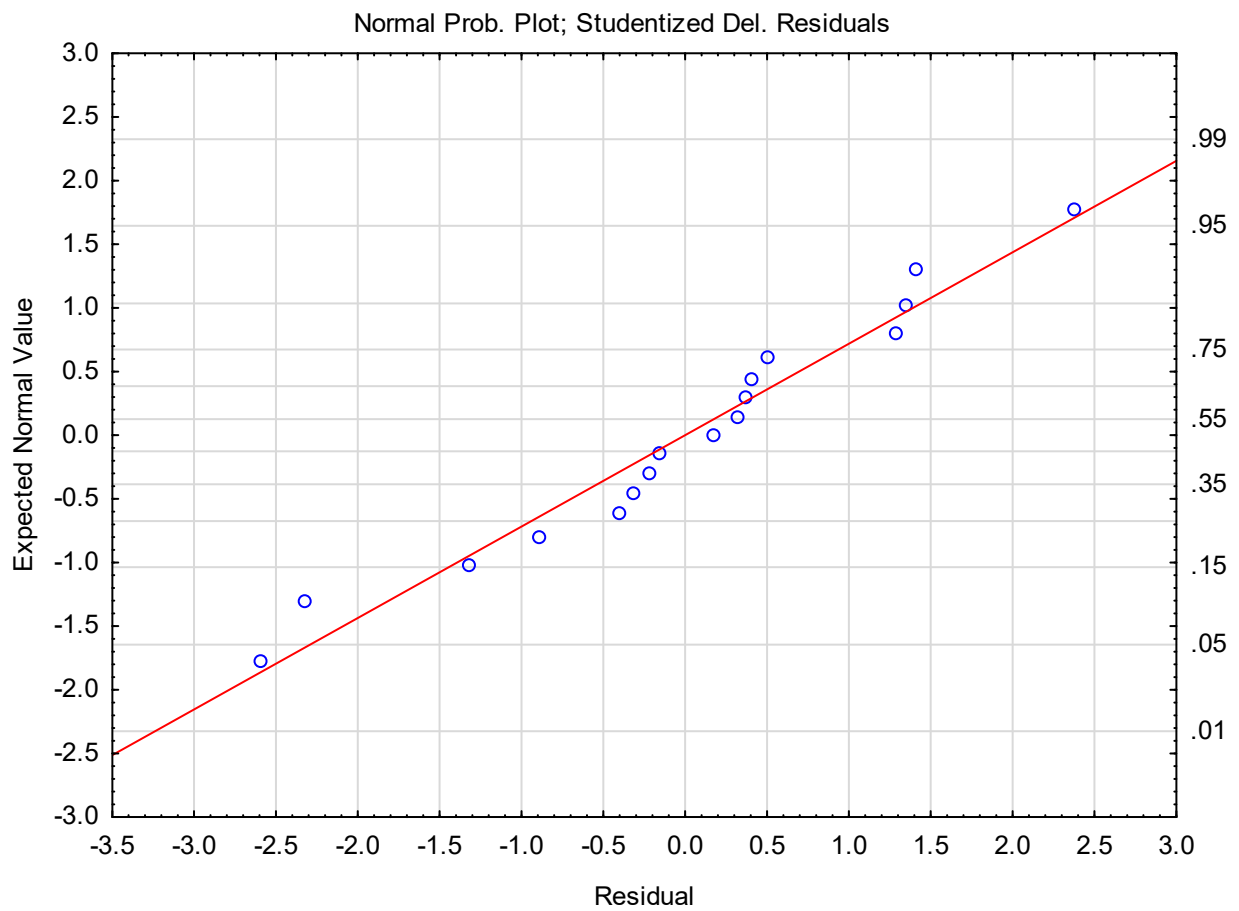

**Figure S6.** Normal probability plot of the studentized residuals (normality test curve for the central composite design  $2^3$ ).

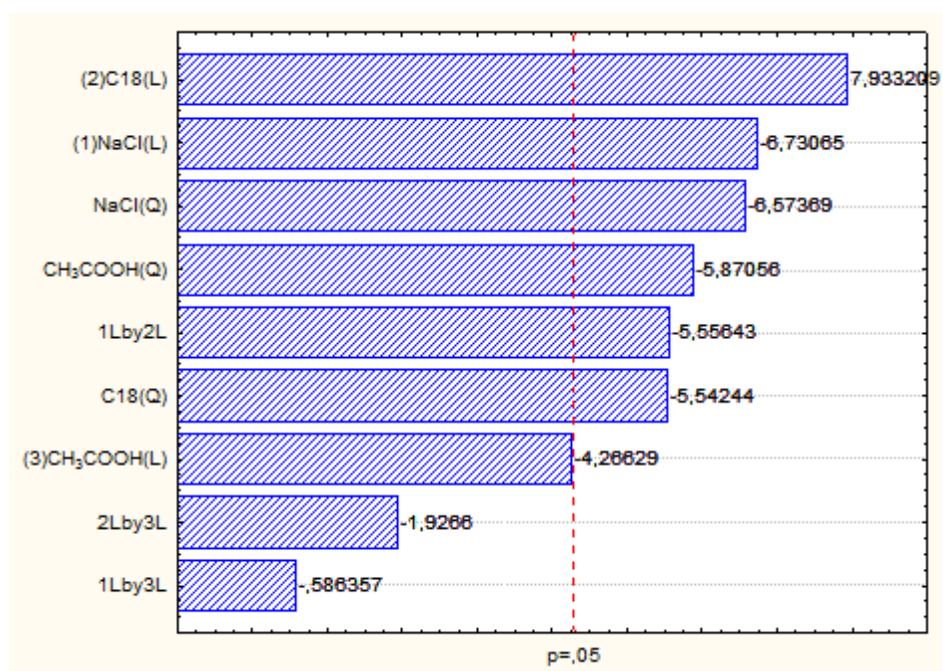

**Figure S7.** Pareto chart for the Central Composite Design (CCD). Vertical line in the chart defines 95% confidence level.

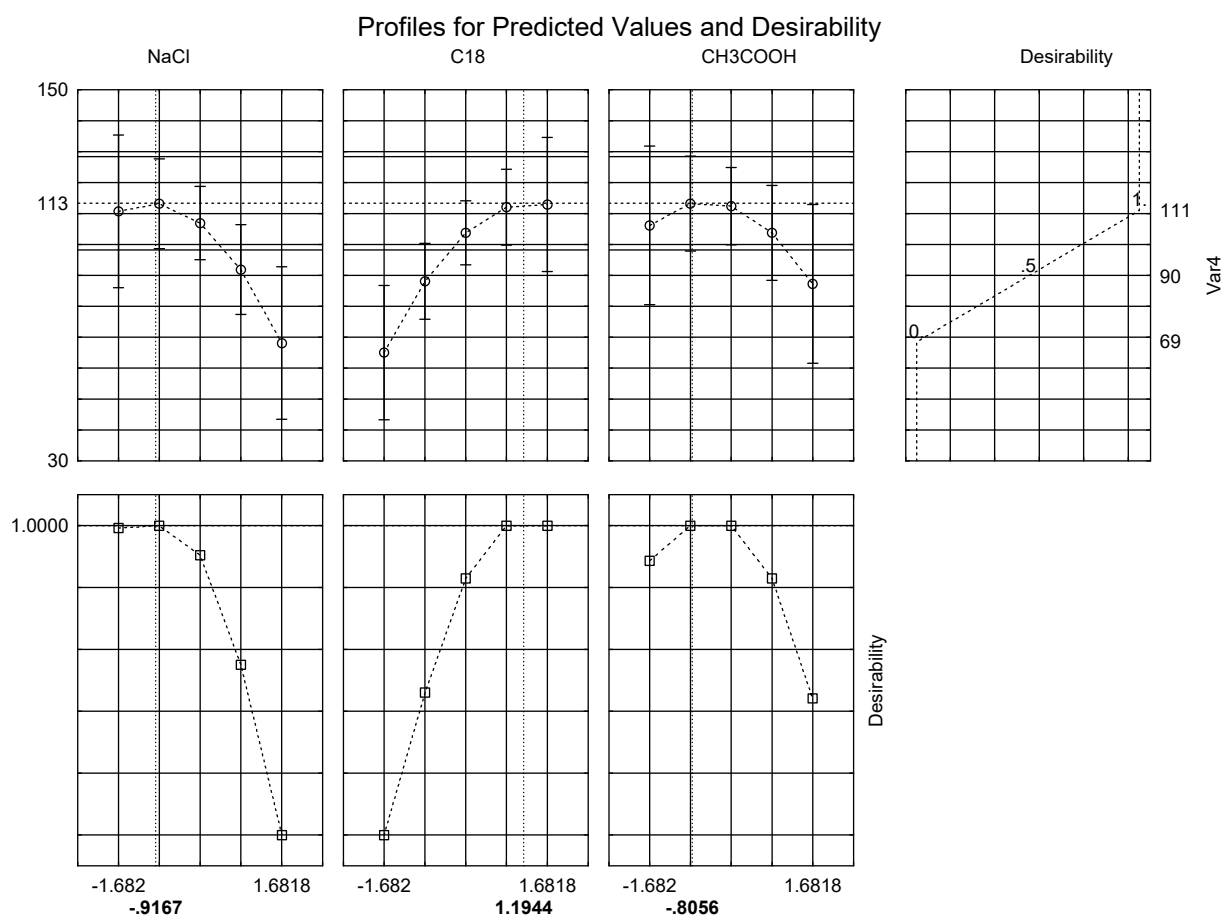

**Figure S8.** Profile of the predicted values and desirability function of the analytes response (mean recovery %) after CCD employment. The optimal values are designated by dotted lines.

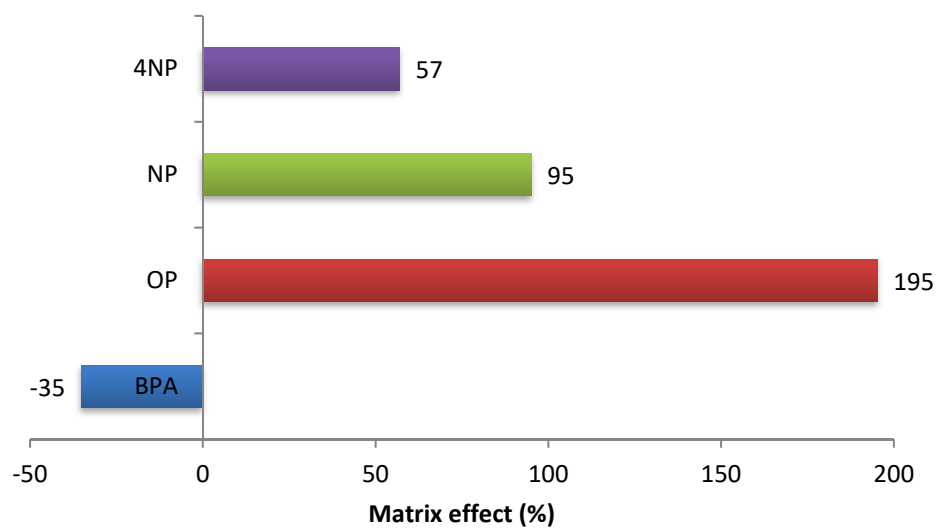

**Figure S9.** Matrix effect of the EDCs under study, calculated from the slopes of the calibration curves.

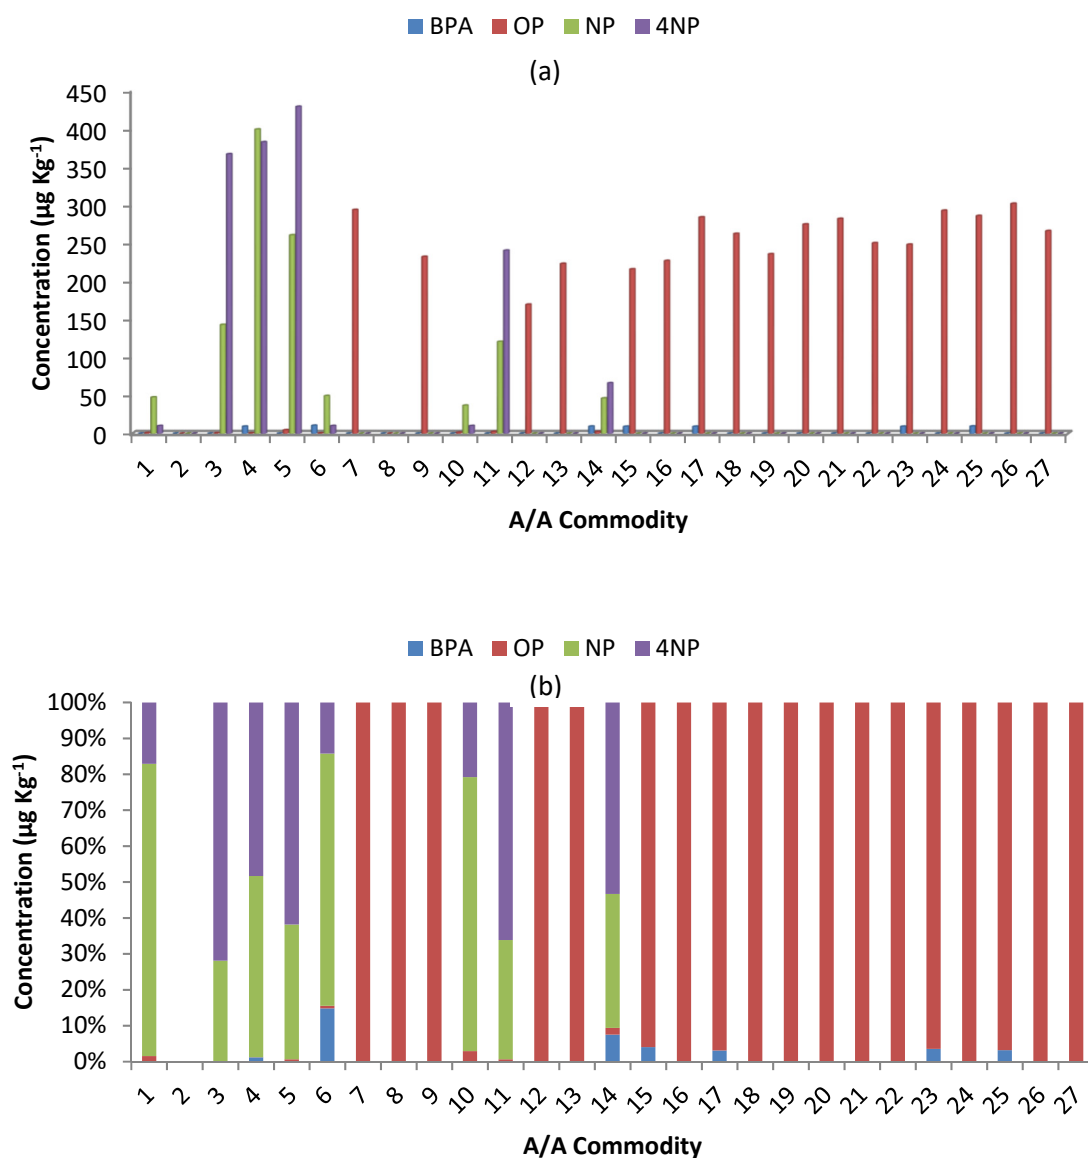

**Figure S10.** (a) Concentration levels of EDCs residues; (b) percentage concentration patterns in all dairy commodities analyzed by QuEChERS coupled to LC-Orbitrap MS. Numbers of the commodities are assigned according to Table S1.

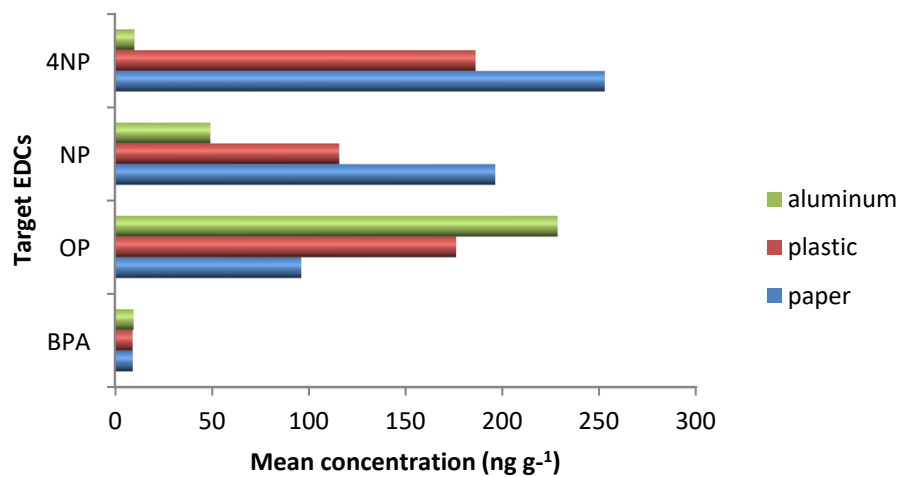

**Figure S11.** Mean concentrations ( $\mu\text{g kg}^{-1}$ ) of the detected EDCs in relation to the type of the packaging material of the analyzed dairy commodities.
